# Supplementary material
Source: PubMed Central journal article supplement (PMC3021029)
Supplement: 1015520107_pnas.1015520107_SI.pdf [file 1015520107_pnas.1015520107_SI.pdf]

# Supporting Information

Melero et al. 10.1073/pnas.1015520107

## SI Text

**SI Materials and Methods. Protein expression and purification.** Human p53 (1–393) was expressed and purified as described previously (1). Briefly, p53 residues 1–393 were cloned into a pET24a-HLTV plasmid containing a 5' extension expressing a His<sub>6</sub>-tag, a lipoyl domain, and a TEV protease cleavage site. A superstable p53 variant with four mutations (M133L/V203A/N239Y/N268D) in the DNA-binding domain (2, 3) was used throughout the study. *Escherichia coli* BL21 cells transformed with plasmid encoding p53 were grown at 37 °C in 2× TY medium with 30 mg/mL kanamycin, and 0.1 mM Zn<sup>2+</sup>. Isopropyl 1-thio-β-D-galactopyranoside (IPTG) was added to a final concentration of 1 mM at O.D.<sub>600</sub> ~ 0.6 to induce expression. After induction, cells were grown at 22 °C for 14 h, followed by harvesting and protein purification.

The cell pellets were resuspended in lysis buffer containing 50 mM NaP<sub>i</sub>, pH 7.5, 150 mM NaCl, 5 mM DTT, and 15% glycerol and lysed using an Emulsiflex C5 high pressure homogenizer (Glen Creston). After centrifugation, the soluble fraction was subjected to several purification steps that include Ni-affinity column, TEV protease digestion, and Heparin HP column. The pooled fractions were purified further on a Superdex 200 26/60 preparative gel filtration column (Amersham Biosciences) in 25 mM NaP<sub>i</sub>, pH 7.2, 150 mM NaCl, 5 mM DTT, and 10% glycerol. The purified p53 proteins were greater than 95% pure as judged by SDS-PAGE. Protein samples were flash-frozen and stored in liquid nitrogen for further use.

**Isolation of p53-DNA tetramers.** For isolation of p53 tetramers bound to DNA, solutions containing p53 at a concentration of 23 μM and the DNA probe at 30 μM were incubated for 30 min at room temperature, and then stored on ice. The reactions were performed in 25 mM sodium phosphate buffer, pH 7.2, 150 mM NaCl, 5 mM DTT, and 5% glycerol (vol/vol). The DNA probes were preannealed and contained the response element for gene GADD45 flanked by random nonspecific sequences (60-mer, 5'-CCTACAGAATCGCTCTACAGAACATGTCTAAGCATGCTGGGGACTGATGCTGGGGACTGG-3', and complementary oligonucleotide; and 44-mer 5'-CCTACTACAGAA-CATGTCTAAGCATGCTGGGGACTGGACTGG-3', and complementary oligonucleotide). The samples were loaded in 15 mL tubes with preformed glycerol (5%–30%) and glutaraldehyde (0%–0.15%) gradients, and centrifuged at 25,000 rpm for 18 h at 4 °C in rotor SW40Ti (Beckman). Gradient formation and fractionation was carried out using the Gradient Station and Piston Gradient Fractionator (Biocomp Instruments, Fredericton, Canada). This methodology is known as GraFix (4).

**Electron microscopy and image processing.** Selected fractions after gradient fractionation were adsorbed on carbon coated grids for 1 min, and then, a second carbon layer floating on a uranyl formate solution at 1% was fished. The resulting grids for EM contain a double carbon sandwich with the sample and the staining agent embedded between two carbon layers. EM samples were visualized in a JEM-2200FS (JEOL Europe, Croissy-sur-Seine, France) at 200 kV. Images were recorded on a 4 k × 4 k CCD camera at a magnification of ~67,000× resulting in a 2.1 Å final pixel size. Images were selected manually and the Contrast Transfer Function (CTF) corrected by flipping inverted frequencies. Reference-based projection matching was performed in EMAN (5) using a previously obtained EM model for p53 · DNA as a starting reference (6). Similar models were obtained using com-

mon-lines procedures in the same software package. Nonsupervised three-dimensional classification of the images for p53 · DNA complexes was performed by the maximum-likelihood based method (7) within the Xmipp package (8). Resolutions for the EM maps were calculated using cutoffs of 0.5 and 0.15 in the Fourier Shell Correlation (FSC) and the estimated values were in the range of 24–30 Å, values for the limit of resolution associated with negative staining and the grain size of the staining agent. Atomic coordinates for DBD · DNA complex [pdb code: 2ATA; (9)] and Tet domains [pdb code: 3SAK; (10)] were fitted as rigid bodies in Chimera (11), which was also used to produce figures.

**Single molecule experiments.** SM-FRET experiments were carried out on a home-built dual-channel confocal fluorescence microscope as described previously (12, 13). Gene encoding for the fragment p53 CTC (94–393) of human p53 was subcloned into Pet24a-HLTV plasmid. All the surface exposed cysteines (124, 182, 275, and 277) were mutated to alanine. Two cysteines were introduced at positions 292 and 372. Protein samples were labeled with Alexa fluor 546 and Alexa fluor 647 (Invitrogen, United Kingdom). After the reaction being quenched with 1 mM β-mercaptoethanol, the labeled protein was separated from the free dyes on a G-25 desalting column. The labeling efficiency was maintained low in order to avoid multiple labeling. 60-mer dsDNA, as used in EM studies, was used in single molecule experiments.

**DNA constructs and production.** Labeled DNA X1-20 (5'-Alexa488-GGACATGTCCGGACATGTCC) was purchased from Operon, whereas X2-20 (5'-fluorescein-GAAGATCTCCCAAGATCTTG) was purchased from Eurogentec, Belgium. Prior to use in experiments single-stranded sequences had to be annealed. X1-20 is palindromic and therefore self-annealing, whereas X2-20 was mixed in equimolar amounts with its reversed-complemented binding partner (CAAGATCTTGGGAGATCTTC). Oligonucleotides were annealed by heating to 95 °C for 5 min followed by cooling at 1 °C/min to room temperature in a PCR block (PTC-100, MJ Research Inc., USA). We constructed a plasmid containing approximately 1,000 base pairs (bp) of the p21 promoter with the p53 RE in the center. This plasmid was used to produce labeled DNA in sufficient quantities by performing several PCR reactions using FastStart PCR Master (Roche). As forward primers the labeled sequences X1 or X2 were used. Reverse primers were designed to guarantee appropriate sequence length. Samples were purified using the NucleoSpin Extract II columns (MachereyNagel) and purity was controlled by agarose gel electrophoresis. Concentration was measured using absorbance spectroscopy. Final sequences: X1-100 (5'-Alexa488-GGACATGTCCGGACATGTCCAGCTCTGGCATA-GAAGAGGCTGGTGGCTATTTTGTCTTGGGCTGCCTG-TTTTCAGGTGAGGAAGGGGATGGTAGGAGACAGGA-GACCCACCCCCCACC, 122 bp), X2-100 (5'-fluorescein-GAAGATCTCCCAAGATCTTGAGCTCTGGCATA-GAAGAGGCTGGTGGCTATTTTGTCTTGGGCTGCCTGTTTT-CAGGTGAGGAAGGGGATGGTAGGAGACAGGACCC-CACCCCCCCCACC, 122 bp), X1-600 (5'-Alexa488-GGACA-TGTCCGGACATGTCCAGCTCTGGCATA-GAAGAGGCTGGTGGCTATTTTGTCTTGGGCTGCCTGTTTT-CAGGTGAGGAAGGGGATGGTAGGAGACAGGA-GACCTCTAAAGACCCAGGTAACCTTAGCCTGT-TACTCTGAACAGGGTATGTGATCTGCCAGCA-
